# Supplementary material
Source: publisher figshare collection journal article supplement (https://karger.figshare.com/ndownloader/files/12374150)
Supplement: Supplementary file 1 [file 12374150]

| Treatment | **WT** |  | **AMPK** |  | **WT** |  | **AMPK** |  | **WT** |  | **AMPK** |
| --- | --- | --- | --- | --- | --- | --- | --- | --- | --- | --- | --- |
| **LEAN** | | |  | **OBESE TO LEAN** | | |  | **OBESE** | | | |
| Indomethacin | 7.1±0.1 |  | 7.4±0.0***** |  | 7.3±0.2 |  | 7.0±0.1**†** |  | 7.4±0.3 |  | 7.6±0.4 |
| + L-NAME | 7.1±0.1 |  | 7.0±0.1 |  | 7.1±0.1 |  | 6.8±0.2 |  | 7.1±0.2 |  | 7.5±0.3 |
| + Apamin *plus* Charybdotoxin | 7.5±0.1 |  | 7.7±0.1 |  | 7.3±0.1 |  | 7.4±0.3 |  | 7.4±0.1 |  | 7.7±0.1**‡** |
